# Supplementary material for: Novel sialic acid derivatives lock open the 150-loop of an influenza A virus group-1 sialidase
Source: Springer Nature journal article supplement (doi:10.1038/ncomms1114), 2010-11-16
Supplement: 41467_2010_BFncomms1114_MOESM1_ESM.mol [file 41467_2010_BFncomms1114_MOESM1_ESM.mol]

  ChemDraw10281017322D

 24 24  0  0  0  0  0  0  0  0999 V2000
    0.7116    0.6325    0.0000 C   0  0  0  0  0  0  0  0  0  0  0  0
    0.7116   -0.2078    0.0000 C   0  0  0  0  0  0  0  0  0  0  0  0
   -0.0005   -0.6203    0.0000 C   0  0  0  0  0  0  0  0  0  0  0  0
   -0.7092   -0.2078    0.0000 C   0  0  0  0  0  0  0  0  0  0  0  0
   -0.7092    0.6325    0.0000 C   0  0  0  0  0  0  0  0  0  0  0  0
   -0.0005    1.0266    0.0000 O   0  0  0  0  0  0  0  0  0  0  0  0
    1.4266    1.0266    0.0000 C   0  0  0  0  0  0  0  0  0  0  0  0
   -0.0005   -1.4777    0.0000 O   0  0  0  0  0  0  0  0  0  0  0  0
    1.4266   -0.6882    0.0000 N   0  0  0  0  0  0  0  0  0  0  0  0
    2.1415    0.6325    0.0000 C   0  0  0  0  0  0  0  0  0  0  0  0
    2.8534    1.0266    0.0000 C   0  0  0  0  0  0  0  0  0  0  0  0
    1.4266    1.9257    0.0000 O   0  0  0  0  0  0  0  0  0  0  0  0
    2.1415   -0.1425    0.0000 O   0  0  0  0  0  0  0  0  0  0  0  0
    2.8534    1.9257    0.0000 O   0  0  0  0  0  0  0  0  0  0  0  0
   -1.4244   -0.6191    0.0000 C   0  0  0  0  0  0  0  0  0  0  0  0
   -2.1382   -0.2053    0.0000 C   0  0  0  0  0  0  0  0  0  0  0  0
   -2.8534   -0.6166    0.0000 C   0  0  0  0  0  0  0  0  0  0  0  0
    0.7123    1.3811    0.0000 H   0  0  0  0  0  0  0  0  0  0  0  0
    1.4266   -1.5132    0.0000 C   0  0  0  0  0  0  0  0  0  0  0  0
    0.7121   -1.9257    0.0000 C   0  0  0  0  0  0  0  0  0  0  0  0
    2.1410   -1.9257    0.0000 O   0  0  0  0  0  0  0  0  0  0  0  0
   -1.4244    1.0266    0.0000 C   0  0  0  0  0  0  0  0  0  0  0  0
   -2.1282    0.6014    0.0000 O   0  0  0  0  0  0  0  0  0  0  0  0
   -1.4408    1.8487    0.0000 O   0  0  0  0  0  0  0  0  0  0  0  0
  7 12  1  6      
 10 13  1  1      
  1  2  1  0      
  2  3  1  0      
  3  4  1  0      
  4  5  2  0      
  5  6  1  0      
  1  6  1  0      
  1  7  1  0      
  3  8  1  1      
  2  9  1  6      
  7 10  1  0      
 10 11  1  0      
 11 14  1  0      
  4 15  1  0      
 15 16  1  0      
 16 17  2  0      
  1 18  1  6      
  9 19  1  0      
 19 20  1  0      
 19 21  2  0      
  5 22  1  0      
 22 23  2  0      
 22 24  1  0      
M  STY  1   1 SUP
M  SLB  1   1   1
M  SAL   1  3  22  23  24
M  SBL   1  1  22
M  SMT   1 ^CO2H
M  SCL   1  
M  SBV   1  22    0.7152   -0.3941
M  END
