# Supplementary material for: Novel sialic acid derivatives lock open the 150-loop of an influenza A virus group-1 sialidase
Source: Springer Nature journal article supplement (doi:10.1038/ncomms1114), 2010-11-16
Supplement: 41467_2010_BFncomms1114_MOESM9_ESM.mol [file 41467_2010_BFncomms1114_MOESM9_ESM.mol]

  ChemDraw10281017322D

 37 37  0  0  0  0  0  0  0  0999 V2000
   -0.3601    0.4084    0.0000 C   0  0  0  0  0  0  0  0  0  0  0  0
   -0.3601   -0.4318    0.0000 C   0  0  0  0  0  0  0  0  0  0  0  0
   -1.0722   -0.8443    0.0000 C   0  0  0  0  0  0  0  0  0  0  0  0
   -1.7809   -0.4318    0.0000 C   0  0  0  0  0  0  0  0  0  0  0  0
   -1.7809    0.4084    0.0000 C   0  0  0  0  0  0  0  0  0  0  0  0
   -1.0722    0.8026    0.0000 O   0  0  0  0  0  0  0  0  0  0  0  0
   -2.4961    0.8026    0.0000 C   0  0  0  0  0  0  0  0  0  0  0  0
    0.3549    0.8026    0.0000 C   0  0  0  0  0  0  0  0  0  0  0  0
   -1.0722   -1.7017    0.0000 O   0  0  0  0  0  0  0  0  0  0  0  0
    0.3549   -0.9123    0.0000 N   0  0  0  0  0  0  0  0  0  0  0  0
    1.0698    0.4084    0.0000 C   0  0  0  0  0  0  0  0  0  0  0  0
    1.7817    0.8026    0.0000 C   0  0  0  0  0  0  0  0  0  0  0  0
    0.3549    1.7017    0.0000 O   0  0  0  0  0  0  0  0  0  0  0  0
    1.0698   -0.3665    0.0000 O   0  0  0  0  0  0  0  0  0  0  0  0
   -2.4961   -0.8431    0.0000 C   0  0  0  0  0  0  0  0  0  0  0  0
   -3.2099   -0.4294    0.0000 C   0  0  0  0  0  0  0  0  0  0  0  0
   -3.9251   -0.8406    0.0000 C   0  0  0  0  0  0  0  0  0  0  0  0
   -0.3594    1.1570    0.0000 H   0  0  0  0  0  0  0  0  0  0  0  0
   -3.2106    0.3901    0.0000 O   0  0  0  0  0  0  0  0  0  0  0  0
   -2.4961    1.6276    0.0000 O   0  0  0  0  0  0  0  0  0  0  0  0
   -3.9251    0.8026    0.0000 C   0  0  0  0  0  0  0  0  0  0  0  0
    0.9382    2.2851    0.0000 C   0  0  0  0  0  0  0  0  0  0  0  0
    0.3549    2.8684    0.0000 C   0  0  0  0  0  0  0  0  0  0  0  0
    1.7632    2.2851    0.0000 O   0  0  0  0  0  0  0  0  0  0  0  0
    2.4961    0.3901    0.0000 O   0  0  0  0  0  0  0  0  0  0  0  0
    3.2106    0.8026    0.0000 C   0  0  0  0  0  0  0  0  0  0  0  0
    3.2106    1.6276    0.0000 O   0  0  0  0  0  0  0  0  0  0  0  0
    3.9251    0.3901    0.0000 C   0  0  0  0  0  0  0  0  0  0  0  0
   -0.4888   -2.2851    0.0000 C   0  0  0  0  0  0  0  0  0  0  0  0
    0.3362   -2.2851    0.0000 O   0  0  0  0  0  0  0  0  0  0  0  0
   -1.0722   -2.8684    0.0000 C   0  0  0  0  0  0  0  0  0  0  0  0
    0.3549   -1.5693    0.0000 C   0  0  0  0  0  0  0  0  0  0  0  0
   -0.3596   -1.9818    0.0000 C   0  0  0  0  0  0  0  0  0  0  0  0
    1.0693   -1.9818    0.0000 O   0  0  0  0  0  0  0  0  0  0  0  0
    1.7843   -0.7790    0.0000 C   0  0  0  0  0  0  0  0  0  0  0  0
    2.4987   -0.3665    0.0000 O   0  0  0  0  0  0  0  0  0  0  0  0
    1.7843   -1.6040    0.0000 C   0  0  0  0  0  0  0  0  0  0  0  0
  8 13  1  6      
 11 14  1  1      
  1  2  1  0      
  2  3  1  0      
  3  4  1  0      
  4  5  2  0      
  5  6  1  0      
  1  6  1  0      
  1  8  1  0      
  3  9  1  1      
  2 10  1  6      
  8 11  1  0      
 11 12  1  0      
  4 15  1  0      
 15 16  1  0      
 16 17  2  0      
  5  7  1  0      
  1 18  1  6      
  7 19  1  0      
  7 20  2  0      
 19 21  1  0      
 13 22  1  0      
 22 23  1  0      
 22 24  2  0      
 12 25  1  0      
 25 26  1  0      
 26 27  2  0      
 26 28  1  0      
  9 29  1  0      
 29 30  2  0      
 29 31  1  0      
 10 32  1  0      
 32 33  1  0      
 32 34  2  0      
 14 35  1  0      
 35 36  2  0      
 35 37  1  0      
M  END
